# Supplementary material for: Novel nucleobase-simplified cyclic ADP-ribose analogue: A concise synthesis and Ca2+-mobilizing activity in T-lymphocytes
Source: Royal Society of Chemistry journal article supplement (doi:10.1039/b925295a), 2010-01-01
Supplement: b925295a.pdf [file b925295a.pdf]

## Electronic Supplementary Information

### Novel Nucleobase-Simplified Cyclic ADP-Ribose Analogue: A Concise Synthesis and Ca<sup>2+</sup>-Mobilizing Activity in T-Lymphocytes

Lingjun Li,<sup>1,2</sup> † Cornelia C. Siebrands<sup>3</sup> †, Zhenjun Yang,<sup>1</sup> Liangren, Zhang,<sup>1</sup> Andreas  
H. Guse<sup>3</sup> and Lihe Zhang<sup>1\*</sup>

<sup>1</sup> *National Laboratory of Natural and Biomimetic Drugs, School of Pharmaceutical  
Sciences, Peking University, Beijing 100083, P.R. China*

<sup>2</sup> *College of Chemistry and Environmental Science, Henan Normal University,  
Xinxiang 453007, P.R. China*

<sup>3</sup> *The Calcium Signaling Group, University Medical Center Hamburg-Eppendorf,  
Center of Experimental Medicine, Institute of Biochemistry and Molecular Biology I:  
Cellular Signal Transduction, 20246 Hamburg, Germany*

<sup>1</sup>H NMR and <sup>13</sup>C NMR data were recorded with a JEOL AL300, Avance 400/DPX (Bruker) or a Varian VXR-500 spectrometer using DMSO-*d*<sub>6</sub>, CD<sub>3</sub>OD, CDCl<sub>3</sub> or D<sub>2</sub>O as solvent. Chemical shifts are reported in parts per million downfield from TMS (<sup>1</sup>H and <sup>13</sup>C). <sup>31</sup>P NMR spectra were recorded at room temperature by use of Bruker Avance 200 spectrometer (81 MHz) and Bruker Avance 300 spectrometer (121.5 MHz); orthophosphoric acid (85%) was used as an external standard. The purity of compound **6b** was determined by HPLC using the known compound 1H-1,2,3-triazole as a control and compound **6b** prepared by new method (lot 5) is consistent with the compound reported by us previously (lot 6).

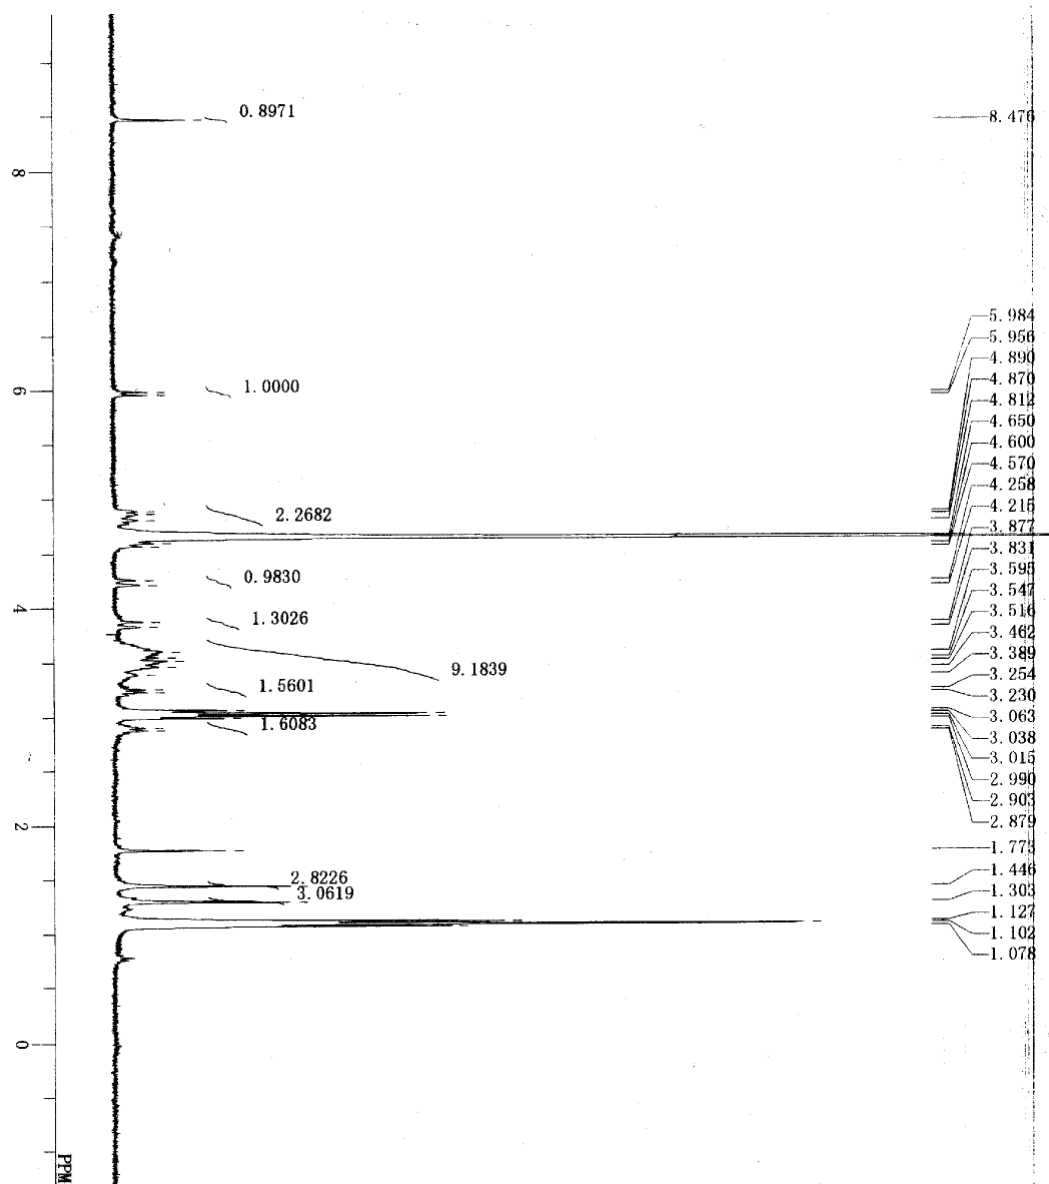

D:\11060815\_als  
 FILE D:\11060815\_als  
 NAME TH  
 ORIGIN TH  
 EXMOD NON  
 300.40 MHz  
 ORFREQ 130.00 KHz  
 ORSET 1150.0 Hz  
 ORFLN 32768  
 POINT 80000.0 Hz  
 FREQ 8  
 SCANS 8  
 ACQTM 4.096 sec  
 PD 1.551 sec  
 PM 6.1 us  
 IRATN 511  
 CTEMP 20.7 c  
 SLVNT D2O  
 EXREF 4.65 ppm  
 BR 0.12 Hz  
 RGAIN 19

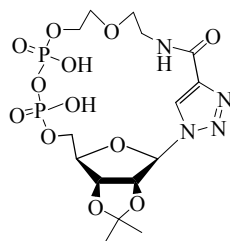

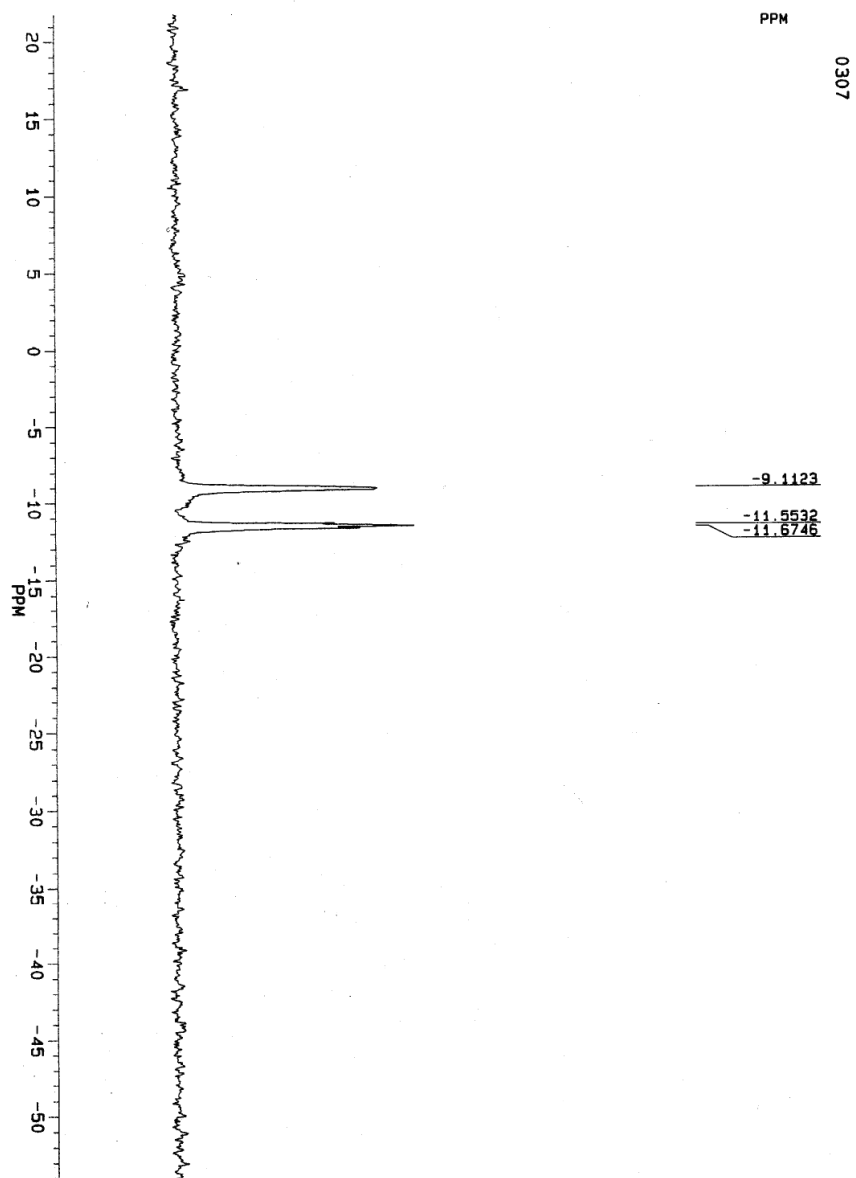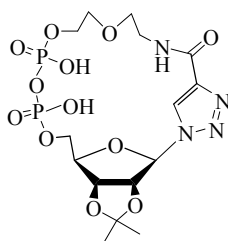

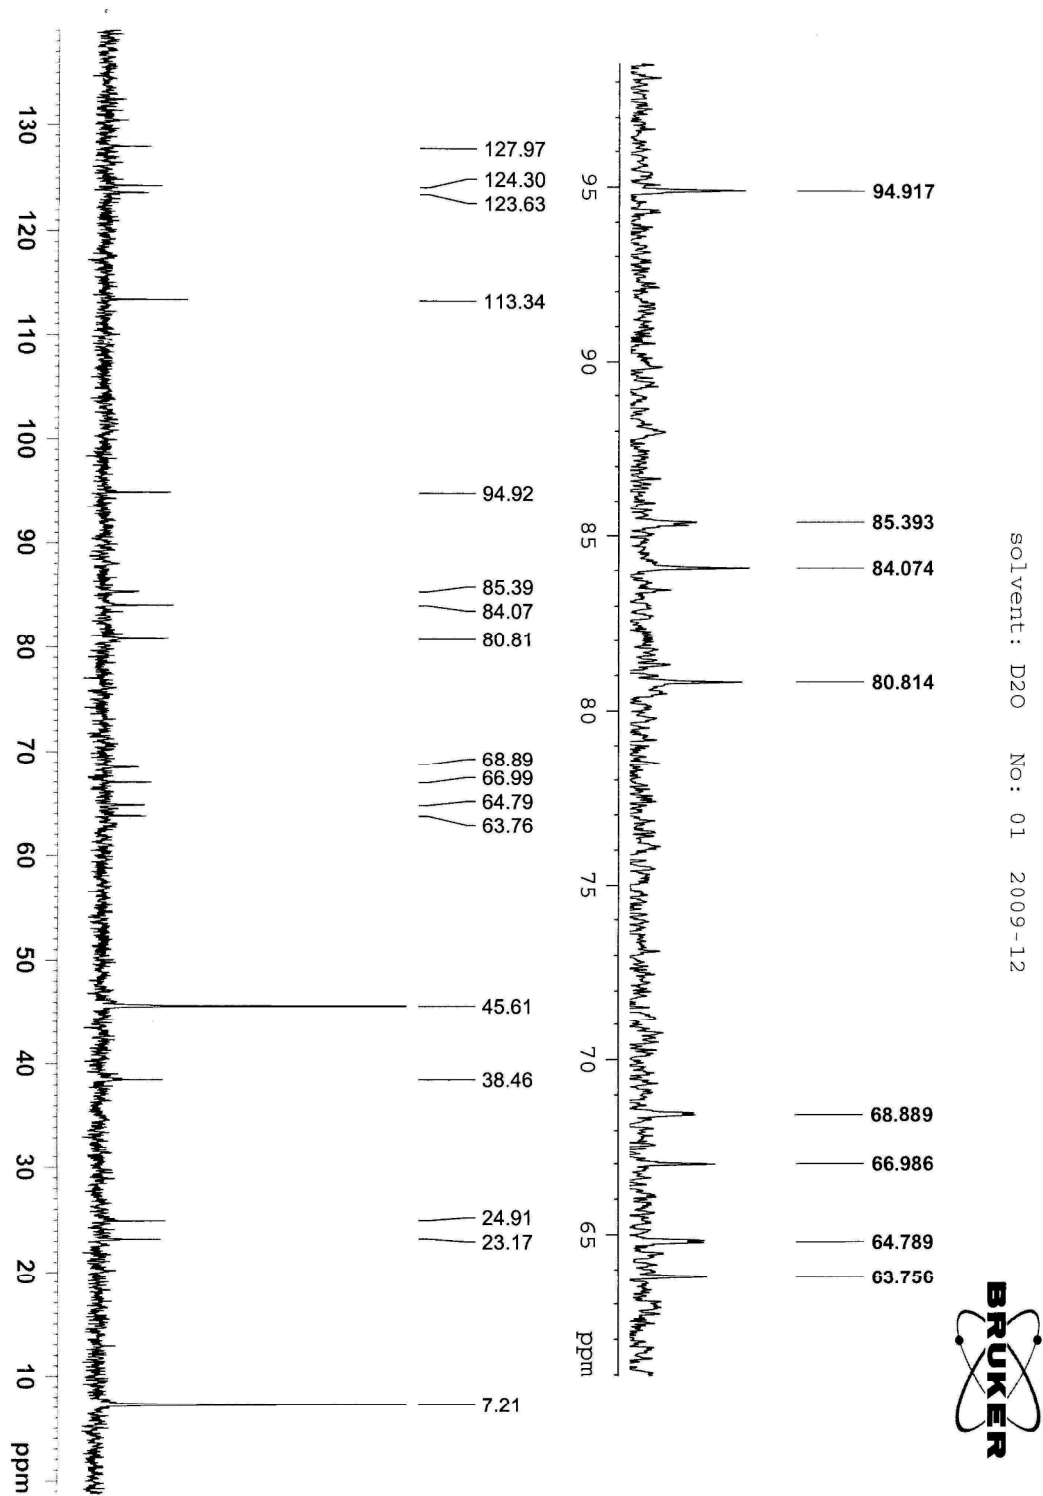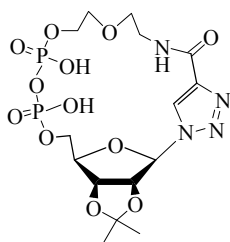

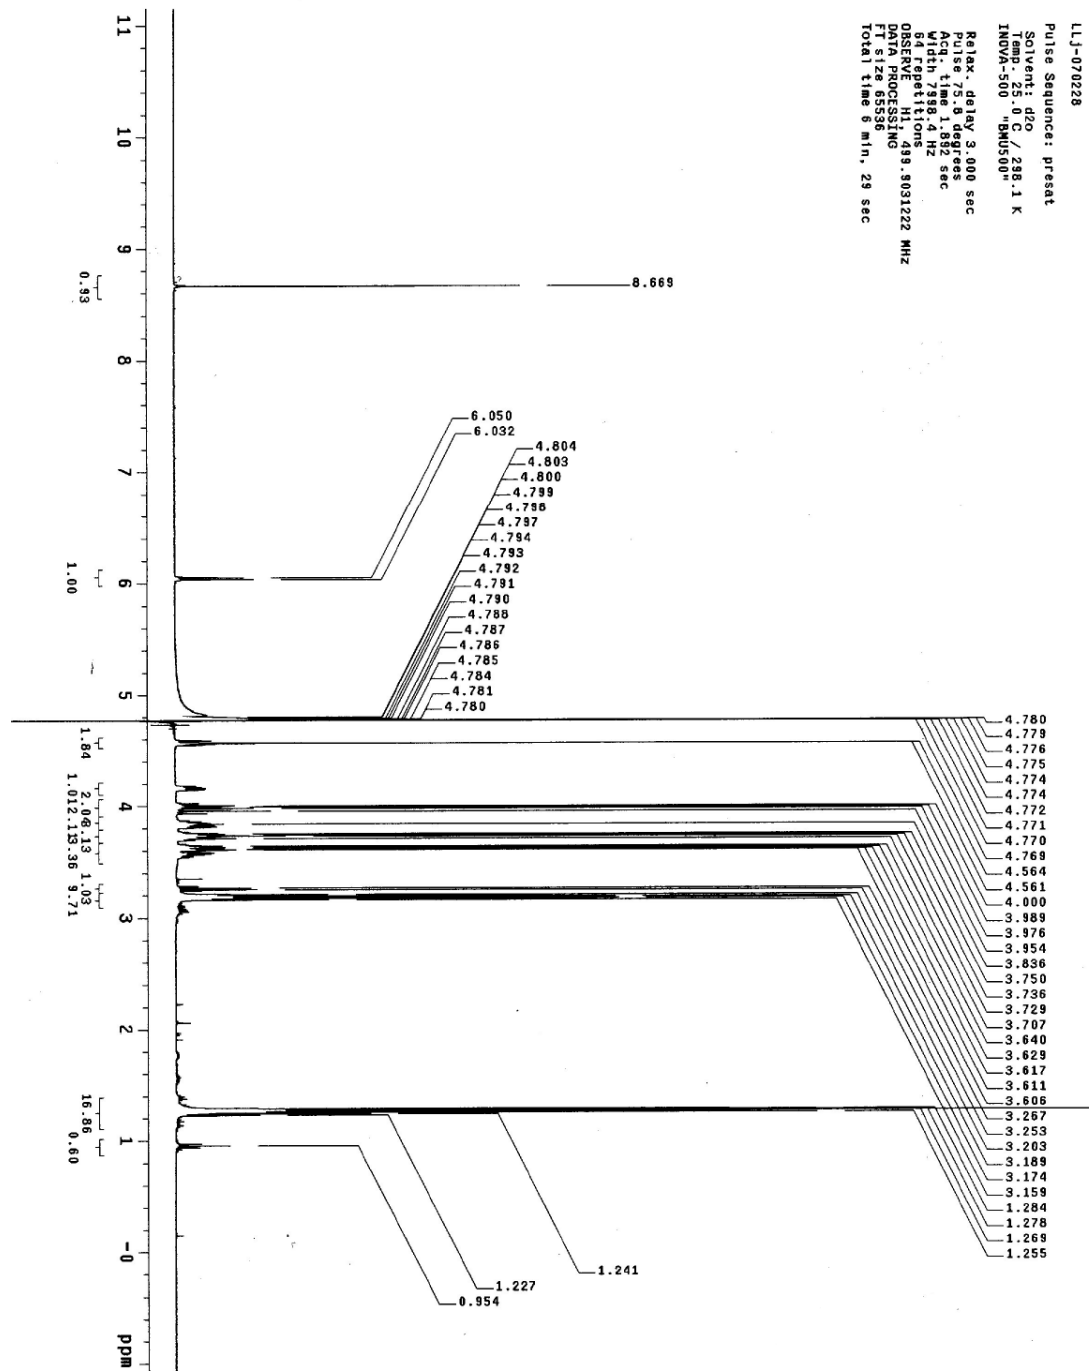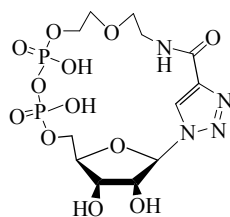

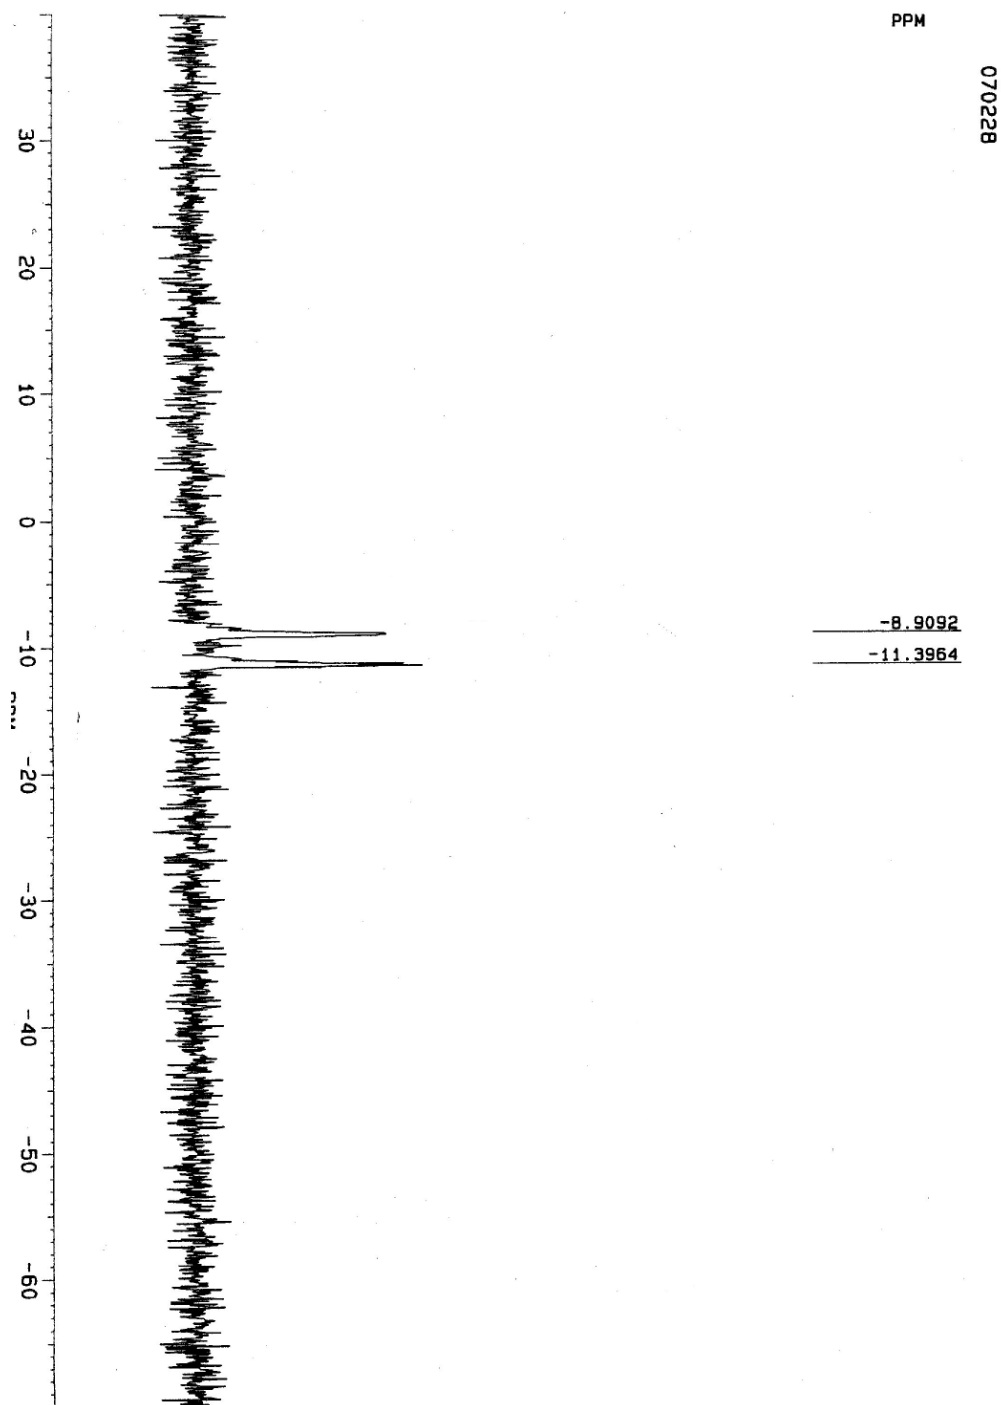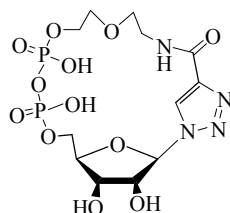

Column: 250 x 4.6 mm Multohyp BDS C 18 - 5  $\mu$   
flow: 1 ml/min; detection: DAD detector (205 nm)  
buffer A: 20 mM  $\text{KH}_2\text{PO}_4$ / 5 mM TBAHP/ pH 6; buffer B: buffer A with 50 % methanol;  
gradient (% buffer B): 0 min (30), 3.5 min (30), 5.5 min (65), 6.5 min (65), 9 min (80), 11 min (100),  
16 min (100), 18 min (30), 27 min (30);

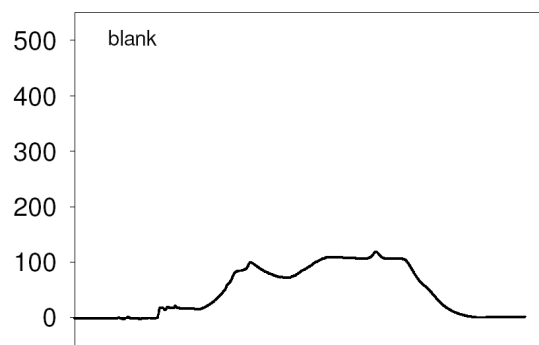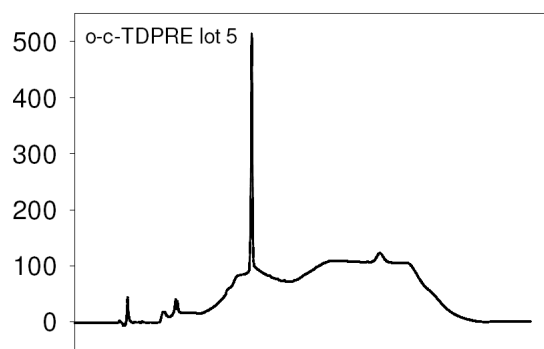

o-c-TDPRE lot5  
RT: 10.5 min  
calculated with reference  
to Triazol: 77 mM  
expected: 50mM

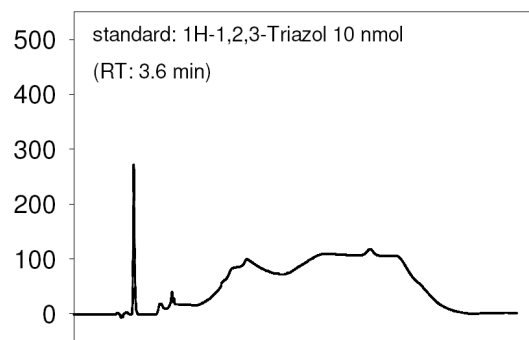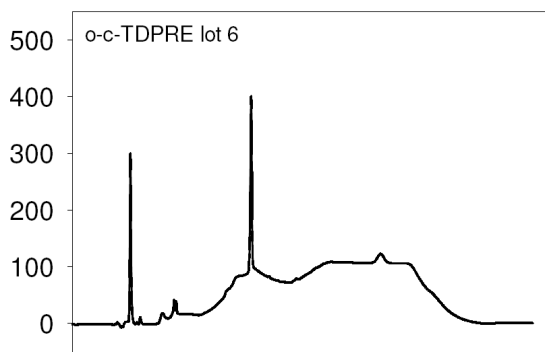

o-c-TDPRE lot6  
RT: 10.5 min  
calculated with reference  
to Triazol: 56 mM  
expected: 50mM;  
additional peak: 3.4 min
